# Supplementary material
Source: HighWire-hosted journal article supplement (https://bmjopen.bmj.com/content/10/8/e037717)
Supplement: inline-supplementary-material-1 [file inline-supplementary-material-1.pdf]

**Supplementary table 1:** Odds ratio (OR) with 95% confidence intervals (CI) for adverse outcomes in the second pregnancy of 29 229 mothers who had a caesarean delivery (CD) in the first pregnancy compared with 170 040 mothers who had a previous vaginal delivery (VD). Among mothers with information on smoking.

| 1 <sup>st</sup> birth                 |       | 2 <sup>nd</sup> birth |                     |                     |                     |
|---------------------------------------|-------|-----------------------|---------------------|---------------------|---------------------|
|                                       |       | Antepartum stillbirth | Crude OR (CI)       | Adj OR (CI)*        | Adj OR (CI) **      |
| CD 1 <sup>st</sup>                    | N (%) | 85 (0.3)              | 1.46 (1.15 to 1.85) | 1.34 (1.04 to 1.72) | 1.33 (1.04 to 1.71) |
| VD 1 <sup>st</sup>                    | N (%) | 339 (0.2)             | 1.0 (ref)           | 1.0 (ref)           | 1.0 (ref)           |
| <b>Intrapartum stillbirth</b>         |       |                       |                     |                     |                     |
| CD 1 <sup>st</sup>                    | N (%) | 8 (0.03)              | 1.29 (0.60 to 2.78) | 1.29 (0.59 to 2.84) | 1.28 (0.58 to 2.81) |
| VD 1 <sup>st</sup>                    | N (%) | 36 (0.02)             | 1.0 (ref)           | 1.0 (ref)           | 1.0 (ref)           |
| <b>Stillbirth (Total)<sup>a</sup></b> |       |                       |                     |                     |                     |
| CD 1 <sup>st</sup>                    | N (%) | 123 (0.4)             | 1.54 (1.27 to 1.89) | 1.45 (1.18 to 1.79) | 1.44 (1.17 to 1.78) |
| VD 1 <sup>st</sup>                    | N (%) | 464 (0.3)             | 1.0 (ref)           | 1.0 (ref)           | 1.0 (ref)           |
| <b>Perinatal mortality</b>            |       |                       |                     |                     |                     |
| CD 1 <sup>st</sup>                    | N (%) | 154 (0.5)             | 1.45 (1.22 to 1.73) | 1.37 (1.14 to 1.64) | 1.36 (1.13 to 1.63) |
| VD 1 <sup>st</sup>                    | N (%) | 618 (0.4)             | 1.0 (ref)           | 1.0 (ref)           | 1.0 (ref)           |
| <b>Early neonatal mortality</b>       |       |                       |                     |                     |                     |
| CD 1 <sup>st</sup>                    | N (%) | 31 (0.1)              | 1.17 (0.80 to 1.72) | 1.05 (0.70 to 1.57) | 1.05 (0.70 to 1.57) |
| VD 1 <sup>st</sup>                    | N (%) | 154 (0.1)             | 1.0 (ref)           | 1.0 (ref)           | 1.0 (ref)           |
| <b>Neonatal mortality</b>             |       |                       |                     |                     |                     |
| CD 1 <sup>st</sup>                    | N (%) | 40 (0.1)              | 1.10 (0.78 to 1.54) | 0.98 (0.69 to 1.39) | 0.98 (0.69 to 1.40) |
| VD 1 <sup>st</sup>                    | N (%) | 212 (0.1)             | 1.0 (ref)           | 1.0 (ref)           | 1.0 (ref)           |
| <b>Cerebral palsy</b>                 |       |                       |                     |                     |                     |
| CD 1 <sup>st</sup>                    | N (%) | 55 (0.2)              | 1.41 (1.05 to 1.89) | 1.22 (0.89 to 1.66) | 1.23 (0.90 to 1.67) |
| VD 1 <sup>st</sup>                    | N (%) | 227 (0.1)             | 1.0 (ref)           | 1.0 (ref)           | 1.0 (ref)           |

\*Adjusted maternal age, birth year, pregnancy related disorders (preeclampsia and diabetes), SGA, and congenital anomalies, uterine rupture, placenta previa, placental abruption in first pregnancy and the studied outcome in the first pregnancy (WITHOUT SMOKING).

\*\*Adjusted maternal age, birth year, pregnancy related disorders (preeclampsia and diabetes), SGA, smoking and congenital anomalies, uterine rupture, placenta previa, placental abruption in first pregnancy and the studied outcome in the first pregnancy.

<sup>a</sup>including stillbirths with unknown timing of death.
