# Supplementary material
Source: HighWire-hosted journal article supplement (https://bmjopen.bmj.com/content/10/8/e037717)
Supplement: inline-supplementary-material-3 [file inline-supplementary-material-3.pdf]

**Supplementary table 3:** Odds ratio (OR) with 95% confidence intervals (CI) for adverse outcomes in the second pregnancy of 39 812 mothers who had a caesarean delivery (CD) in the first pregnancy compared with 234 229 mothers who had a previous vaginal delivery (VD). Mothers who delivered their first infant during 1999-2011.

| 1 <sup>st</sup> birth | 2 <sup>nd</sup> birth |                                 |                     |                     |
|-----------------------|-----------------------|---------------------------------|---------------------|---------------------|
|                       |                       | Antepartum stillbirth           | Crude OR (CI)       | Adj OR (CI) *       |
| CD 1 <sup>st</sup>    | N (%)                 | 124 (0.3)                       | 1.50 (1.23 to 1.83) | 1.37 (1.11 to 1.69) |
| VD 1 <sup>st</sup>    | N (%)                 | 486 (0.2)                       | 1.0 (ref)           | 1.0 (ref)           |
|                       |                       | Intrapartum stillbirth          |                     |                     |
| CD 1 <sup>st</sup>    | N (%)                 | 14 (0.04)                       | 1.62 (0.89 to 2.92) | 1.86 (1.01 to 3.43) |
| VD 1 <sup>st</sup>    | N (%)                 | 51 (0.02)                       | 1.0 (ref)           | 1.0 (ref)           |
|                       |                       | Stillbirth (Total) <sup>a</sup> |                     |                     |
| CD 1 <sup>st</sup>    | N (%)                 | 172 (0.4)                       | 1.56 (1.32 to 1.85) | 1.49 (1.25 to 1.78) |
| VD 1 <sup>st</sup>    | N (%)                 | 650 (0.3)                       | 1.0 (ref)           | 1.0 (ref)           |
|                       |                       | Perinatal mortality             |                     |                     |
| CD 1 <sup>st</sup>    | N (%)                 | 222 (0.6)                       | 1.51 (1.30 to 1.75) | 1.44 (1.24 to 1.69) |
| VD 1 <sup>st</sup>    | N (%)                 | 867 (0.4)                       | 1.0 (ref)           | 1.0 (ref)           |
|                       |                       | Early neonatal mortality        |                     |                     |
| CD 1 <sup>st</sup>    | N (%)                 | 50 (0.1)                        | 1.36 (1.00 to 1.85) | 1.28 (0.93 to 1.77) |
| VD 1 <sup>st</sup>    | N (%)                 | 217 (0.1)                       | 1.0 (ref)           | 1.0 (ref)           |
|                       |                       | Neonatal mortality              |                     |                     |
| CD 1 <sup>st</sup>    | N (%)                 | 64 (0.2)                        | 1.23 (0.94 to 1.61) | 1.12 (0.84 to 1.48) |
| VD 1 <sup>st</sup>    | N (%)                 | 307 (0.1)                       | 1.0 (ref)           | 1.0 (ref)           |
|                       |                       | Cerebral palsy                  |                     |                     |
| CD 1 <sup>st</sup>    | N (%)                 | 79 (0.2)                        | 1.45 (1.13 to 1.85) | 1.30 (1.00 to 1.68) |
| VD 1 <sup>st</sup>    | N (%)                 | 321 (0.1)                       | 1.0 (ref)           | 1.0 (ref)           |

\*Adjusted for maternal age, birth year, pregnancy related disorders (preeclampsia and diabetes), SGA, congenital anomalies, uterine rupture, placenta previa, placental abruption in first pregnancy and the studied outcome in the first pregnancy.

<sup>a</sup>including stillbirths with unknown timing of death
