# Supplementary material
Source: HighWire-hosted journal article supplement (https://bmjopen.bmj.com/content/10/8/e037717)
Supplement: inline-supplementary-material-4 [file inline-supplementary-material-4.pdf]

**Supplementary table 4:** Odds ratio (OR) with 95% confidence intervals (CI) for adverse secondary outcomes in the second pregnancy of 39 812 mothers who had a caesarean delivery (CD) in the first pregnancy compared with 234 229 mothers who had a previous vaginal delivery (VD). Mothers who delivered their first infant during 1999-2011.

| 1 <sup>st</sup> birth                 | 2 <sup>nd</sup> birth |                                        |                      |                      |
|---------------------------------------|-----------------------|----------------------------------------|----------------------|----------------------|
|                                       |                       | Small for gestational age <sup>a</sup> | Crude OR (CI)        | Adj OR (CI)*         |
| CD 1 <sup>st</sup>                    | N (%)                 | 598 (1.5)                              | 1.62 (1.48 to 1.79)  | 1.31 (1.18 to 1.44)  |
| VD 1 <sup>st</sup>                    | N (%)                 | 2178 (0.9)                             | 1.0 (ref)            | 1.0 (ref)            |
| <b>Preterm birth<sup>b</sup></b>      |                       |                                        |                      |                      |
| CD 1 <sup>st</sup>                    | N (%)                 | 2485 (6.3)                             | 1.72 (1.64 to 1.80)  | 1.17 (1.11 to 1.23)  |
| VD 1 <sup>st</sup>                    | N (%)                 | 8716 (3.8)                             | 1.0 (ref)            | 1.0 (ref)            |
| <b>Very preterm birth<sup>b</sup></b> |                       |                                        |                      |                      |
| CD 1 <sup>st</sup>                    | N (%)                 | 537 (1.4)                              | 1.98 (1.80 to 2.19)  | 1.28 (1.14 to 1.44)  |
| VD 1 <sup>st</sup>                    | N (%)                 | 1603 (0.7)                             | 1.0 (ref)            | 1.0 (ref)            |
| <b>Postpartum haemorrhage</b>         |                       |                                        |                      |                      |
| CD 1 <sup>st</sup>                    | N (%)                 | 11 082 (28)                            | 2.75 (2.68 to 2.82)  | 2.33 (2.27 to 2.40)  |
| VD 1 <sup>st</sup>                    | N (%)                 | 28 810 (12)                            | 1.0 (ref)            | 1.0 (ref)            |
| <b>Placenta previa</b>                |                       |                                        |                      |                      |
| CD 1 <sup>st</sup>                    | N (%)                 | 266 (0.7)                              | 2.60 (2.25 to 3.01)  | 2.34 (2.01 to 2.73)  |
| VD 1 <sup>st</sup>                    | N (%)                 | 604 (0.3)                              | 1.0 (ref)            | 1.0 (ref)            |
| <b>Placental abruption</b>            |                       |                                        |                      |                      |
| CD 1 <sup>st</sup>                    | N (%)                 | 267 (0.7)                              | 2.49 (2.16 to 2.87)  | 2.15 (1.84 to 2.51)  |
| VD 1 <sup>st</sup>                    | N (%)                 | 634 (0.3)                              | 1.0 (ref)            | 1.0 (ref)            |
| <b>Abnormal invasive placenta</b>     |                       |                                        |                      |                      |
| CD 1 <sup>st</sup>                    | N (%)                 | 111 (0.3)                              | 1.15 (0.94 to 1.41)  | 1.02 (0.82 to 1.26)  |
| VD 1 <sup>st</sup>                    | N (%)                 | 570 (0.2)                              | 1.0 (ref)            | 1.0 (ref)            |
| <b>Uterine rupture</b>                |                       |                                        |                      |                      |
| CD 1 <sup>st</sup>                    | N (%)                 | 172 (0.4)                              | 92.4 (50.2 to 170.0) | 86.6 (46.9 to 160.1) |
| VD 1 <sup>st</sup>                    | N (%)                 | 11 (0.005)                             | 1.0 (ref)            | 1.0 (ref)            |
| <b>Preeclampsia</b>                   |                       |                                        |                      |                      |
| CD 1 <sup>st</sup>                    | N (%)                 | 1888 (4.7)                             | 2.61 (2.47 to 2.75)  | 1.62 (1.52 to 1.72)  |
| VD 1 <sup>st</sup>                    | N (%)                 | 4393 (1.9)                             | 1.0 (ref)            | 1.0 (ref)            |

\*Adjusted maternal age, birth year, pregnancy related disorders (preeclampsia and diabetes), SGA, and congenital anomalies, uterine rupture, placenta previa, placental abruption in first pregnancy and the studied outcome in the first pregnancy.

<sup>a</sup>300 (0.8%) deliveries with missing information on SGA in the caesarean group and 1995 (0.9%) in the vaginal group.

<sup>b</sup>297 (0.7%) deliveries with missing information on GA in the caesarean group and 1907 (0.8%) in the vaginal group.
